# Supplementary material
Source: HighWire-hosted journal article supplement (https://cmajopen.ca/highwire/filestream/84923/field_highwire_adjunct_files/1/2020-0290-2-at.pdf)
Supplement: 2020-0290-2-at.pdf [file 2020-0290-2-at.pdf]

## Appendix 2 (as supplied by the authors): Supplementary table

### Data dictionary for retrospectively collected variables

| Data Element                          | Definition                                                                                                     | Specifications                                                                                                                                                                                                                                                                              |
|---------------------------------------|----------------------------------------------------------------------------------------------------------------|---------------------------------------------------------------------------------------------------------------------------------------------------------------------------------------------------------------------------------------------------------------------------------------------|
| <b>Demographics</b>                   |                                                                                                                |                                                                                                                                                                                                                                                                                             |
| Hospital site                         | Hospital where the patient was arrived at.                                                                     | Field type: Categorical (select one only)<br>Field length: 3 digits assigned to each participating hospital site<br><br>Valid data: 101 - 907                                                                                                                                               |
| ED arrival date and time              | Date and time the patient arrived to the ED (before triage).                                                   | Field type: Date time<br>Field length 14<br><br>Valid data: YYYY-MM-DD HH:MM:SS                                                                                                                                                                                                             |
| Sex                                   | The sex of the patient.                                                                                        | Field type: Categorical (select one only)<br>Field length: 1 digit<br><br>Valid data: 0, 1, 2<br><br>0 = Male<br>1 = Female<br>2 = Intersex                                                                                                                                                 |
| Arrival from                          | The origin of the patient prior to arriving to the ED.                                                         | Field type: Categorical (select one only)<br>Field length 1 digit<br><br>Valid data: 0-6<br><br>0 = Home (community)<br>1 = No fixed address<br>2 = Long-term care/Rehab (includes assisted living)<br>3 = Shelter<br>4 = Single room occupancy<br>5 = Inter-hospital transfer<br>6 = Other |
| Provide detail around 'Other' arrival | If the origin of the patient prior to arriving to the ED is 'Other', use free text to provide further details. | Field type: Free-text<br><br>Valid data: Free text or blank                                                                                                                                                                                                                                 |
| Postal code                           | First 3 characters of the postal code of where the patient lives prior to arriving at the ED.                  | Field type: Character<br>Field length: 3 characters<br><br>Valid data: ANA or XXX<br><br>XXX = patients originated outside of Canada                                                                                                                                                        |
| Calculated age (in years)             | Calculated difference between arrival date and time and data of birth.                                         | Field type: Numeric<br>Field length: 3 digits<br><br>Valid data: 0 to 150                                                                                                                                                                                                                   |

| <b>Data Element</b>                          | <b>Definition</b>                                                                                                                | <b>Specifications</b>                                                                                                                                                                                                                                                                                                                                                                                                                                                                    |
|----------------------------------------------|----------------------------------------------------------------------------------------------------------------------------------|------------------------------------------------------------------------------------------------------------------------------------------------------------------------------------------------------------------------------------------------------------------------------------------------------------------------------------------------------------------------------------------------------------------------------------------------------------------------------------------|
| Age (in months)                              | Age in months as per recorded in the medical chart if the patient is between 2 to 12 months.                                     | Field type: Numeric<br>Field length: 2 digits<br><br>Valid data: 2 to 12                                                                                                                                                                                                                                                                                                                                                                                                                 |
| Age (in days) for individuals under 2 months | Age in days as per recorded in the medical chart if the patient is less than 2 months old.                                       | Field type: Numeric<br>Field length: 2 digits<br><br>Valid data: 0 to 70                                                                                                                                                                                                                                                                                                                                                                                                                 |
| Risk for infection                           | The state in which the patient was at risk to be infected by SARS-CoV2.                                                          | Field type: Categorical (with option to select more than one category)<br>Field length: 1 digit<br><br>Valid data: 0 to 8<br><br>1 = Travel from country with known cases within 14 days<br>2 = Institutional exposure (e.g. LTC, prison),<br>3 = Healthcare worker<br>4 = Microbiology lab<br>5 = Household/caregiver contact<br>6 = Other<br>7 = Unknown (Nothing documented in charts on risk of infection)<br>8 = No documented risk for infection (Documented no risk of infection) |
| Other risk of infection                      | For the state in which the patient was at risk to be infected by SARS-CoV2 is 'Other', use free text to provide further details. | Field type: Free-text<br><br>Valid data: Free text or blank                                                                                                                                                                                                                                                                                                                                                                                                                              |
| Institutional type                           | For patient who had institutional exposure (e.g. LTC, prison), indicate the kind of institutional exposure.                      | Field type: Categorical (with option to select more than one category)<br>Field length: 1 digit<br><br>Valid data: 0 to 5<br><br>1 = Correctional Facility<br>2 = Hospital<br>3 = Shelter<br>4 = Long-term care/rehab<br>5 = Other                                                                                                                                                                                                                                                       |
| Other institutional type                     | For patient who had 'Other' kind of institutional exposures, use the free text to provide further details.                       | Field type: Free-text<br><br>Valid data: Free text or blank                                                                                                                                                                                                                                                                                                                                                                                                                              |

| Data Element<br>Comorbidities                                      | Definition                                                                                                                | Specifications                                                                                                                                                                                                                                                                                                                                                                                                                                                                                                                                                                                                                                                                                                                                                                                                                                                                                                                                                                                        |
|--------------------------------------------------------------------|---------------------------------------------------------------------------------------------------------------------------|-------------------------------------------------------------------------------------------------------------------------------------------------------------------------------------------------------------------------------------------------------------------------------------------------------------------------------------------------------------------------------------------------------------------------------------------------------------------------------------------------------------------------------------------------------------------------------------------------------------------------------------------------------------------------------------------------------------------------------------------------------------------------------------------------------------------------------------------------------------------------------------------------------------------------------------------------------------------------------------------------------|
| Comorbid conditions                                                | The diagnosis, conditions, problem or circumstances for the patient's ED visit that is in addition to the main diagnosis. | Field type: Categorical (with option to select more than one category)<br>Field length: 2 digits<br><br>Valid data: 1 to 23<br><br>1 = Congestive heart failure<br>2 = Coronary artery disease<br>3 = Hypertension<br>4 = Asthma<br>5 = Pulmonary fibrosis<br>6 = Chronic lung disease<br>7 = Chronic kidney<br>8 = Dialysis<br>9 = Diabetes<br>10 = Mild liver disease<br>11 = Moderate/severe<br>12 = Organ transplant<br>13 = Chronic neuro<br>14 = Dementia<br>15 = Rheumatologic disorder<br>16 = Active malignant neoplasm<br>17 = Past malignant neoplasm<br>18 = Obesity (clinical impression)<br>19 = Other<br>20 = Atrial Fibrillation,<br>21= Psychiatric Condition/Mental Health Diagnosis<br>22 = Dyslipidemia<br>23 = Hypothyroidism<br><br>Moderate or severe liver disease is defined as cirrhosis with portal hypertension, with or without bleeding or a history of variceal bleeding. Mild liver disease is defined as cirrhosis without portal hypertension or chronic hepatitis. |
| Other Comorbidity<br><br>*Up to 5 other comorbidities is collected | If the comorbidity is 'Other', use the free text to provide further details.                                              | Field type: Free-text<br><br>Valid data: Free text or blank                                                                                                                                                                                                                                                                                                                                                                                                                                                                                                                                                                                                                                                                                                                                                                                                                                                                                                                                           |

| <b>Data Element</b>            | <b>Definition</b>                                                                                             | <b>Specifications</b>                                                                                                                                                                                                                                                                                                               |
|--------------------------------|---------------------------------------------------------------------------------------------------------------|-------------------------------------------------------------------------------------------------------------------------------------------------------------------------------------------------------------------------------------------------------------------------------------------------------------------------------------|
| Breastfeeding                  | For female or intersex patient, indicate if patient was breastfeeding prior to arrival to the ED.             | Field type: Categorical (select one only)<br>Field length: 1 digit<br><br>Valid data: 0, 1, 9<br><br>0 = No<br>1 = Yes<br>9 = Uncertain                                                                                                                                                                                             |
| <b>Outpatient Medications</b>  |                                                                                                               |                                                                                                                                                                                                                                                                                                                                     |
| Medications use pre-ED         | Medications use by the patient prior to arriving to the ED.                                                   | Field type: Categorical (select one only)<br>Field length: 1 digit<br><br>Valid data: 0 to 2<br><br>0 = I confirm that I have no access to the patient's pre-ED medication list<br>1 = I have reviewed the patient's pre-ED medication list and the patient is not on any medications.<br>2 = Yes, the medications are listed below |
| Prescription medication pre-ED | Medications prescribed to the patient prior to arriving to the ED.                                            | Field type: Categorical (with option to select more than one category)<br>Field length: 2 digits<br><br>Valid data: 0001 to 1100<br><br>For the full drug list, refer to <a href="https://canadiancovid19registry.org/">https://canadiancovid19registry.org/</a> .                                                                  |
|                                | *Up to 20 medications is recorded*                                                                            |                                                                                                                                                                                                                                                                                                                                     |
| Other medications pre-ED       | Medications prescribed to the patient prior to arriving to the ED that is not indicated in the dropdown list. | Field type: Free-text or blank                                                                                                                                                                                                                                                                                                      |
| Over the counter medication    | Over the counter medications the patient used prior to arriving to the ED.                                    | Field type: Free-text or blank                                                                                                                                                                                                                                                                                                      |
| ED Arrival Mode                | The mode by which the patient arrived to the ED.                                                              | Field type: Categorical (Select one only)<br>Field length: 1 digit<br><br>Valid data: 0, 1, 2<br><br>0 = Self<br>1 = Ambulance<br>2 = Police                                                                                                                                                                                        |
| Treating physician(s)          | The physicians who attended to the patient at the ED.                                                         | Field type: Free-text<br><br>Valid data: Text or blank                                                                                                                                                                                                                                                                              |

| Data Element | Definition                                                                                                                                                                                                                                                  | Specifications                                                                                                                                                                                                                                                                                                                                                                                                                                                                                                                                                                                                                                                                                                                                                                                                                                                                                                                                                                                                                                                                                                                                                                                                                                                                                                                                                                                                                                                                                                                          |
|--------------|-------------------------------------------------------------------------------------------------------------------------------------------------------------------------------------------------------------------------------------------------------------|-----------------------------------------------------------------------------------------------------------------------------------------------------------------------------------------------------------------------------------------------------------------------------------------------------------------------------------------------------------------------------------------------------------------------------------------------------------------------------------------------------------------------------------------------------------------------------------------------------------------------------------------------------------------------------------------------------------------------------------------------------------------------------------------------------------------------------------------------------------------------------------------------------------------------------------------------------------------------------------------------------------------------------------------------------------------------------------------------------------------------------------------------------------------------------------------------------------------------------------------------------------------------------------------------------------------------------------------------------------------------------------------------------------------------------------------------------------------------------------------------------------------------------------------|
| CTAS         | <p>The CTAS assigned to the patient.</p> <p>The CTAS (Canadian Triage and Acuity Scale) is a 5 point scale that emergency rooms (ERs) use to evaluate a patient's acuity level to more accurately define the patient's needs and allow for timely care.</p> | <p>Field type: Categorical (Select one only)</p> <p>Field length: 1 digit</p> <p>Valid data: 1-5</p> <p>1 = requires resuscitation. It includes conditions that are threats to life or imminent risk of deterioration, requiring immediate aggressive interventions (e.g., cardiac arrest, major trauma or shock states).</p> <p>2 = requires emergent care. It includes conditions that are a potential threat to life or limb function requiring rapid medical intervention or delegated acts (e.g., head injury, chest pain, gastrointestinal bleeding, abdominal pain with visceral symptoms, or neonates with hyperbilirubinemia).</p> <p>3 = requires urgent care. It includes conditions that could potentially progress to a serious problem requiring emergency intervention (e.g., mild moderate asthma or dyspnea, moderate trauma, or vomiting and diarrhea in patients younger than 2 years).</p> <p>4 = requires less urgent care. It includes conditions related to patient age, distress, or potential for deterioration or complications that would benefit from intervention or reassurance within 1 to 2 hours (e.g., such as urinary symptoms, mild abdominal pain, or earache).</p> <p>5 = requires non-urgent care. It includes conditions in which investigations or interventions could be delayed or referred to other areas of the hospital or health care system (e.g., a sore throat, menses, conditions related to chronic problems, or psychiatric complaints with no suicidal ideation or attempts).</p> |

| <b>Data Element</b>                     | <b>Definition</b>                                                                                                                                                                                                                                                                                                                                                                                                                                                                    | <b>Specifications</b>                                                        |
|-----------------------------------------|--------------------------------------------------------------------------------------------------------------------------------------------------------------------------------------------------------------------------------------------------------------------------------------------------------------------------------------------------------------------------------------------------------------------------------------------------------------------------------------|------------------------------------------------------------------------------|
| Presenting complaint                    | The main reason the patient went to the ED. Presenting complaints differ from diagnoses in that the patient may initially present with vague symptoms such as chest pain or swelling, and the clinician later determines the formal diagnosis (e.g., acute myocardial infarction, anaphylactic shock) after examination of the patient. This examination might include laboratory tests or diagnostic interventions. The clinician's diagnosis is not listed on the ED visit record. | Field type: Free-text<br><br>Valid data: Text                                |
| Arrival heart rate                      | The heart rate (in beats per minute) of the patient upon arrival to the ED.                                                                                                                                                                                                                                                                                                                                                                                                          | Field type: Numeric<br>Field length: 3 digits<br><br>Valid data: 0 - 300     |
| Arrival systolic blood pressure         | The systolic blood pressure (in mmHg) of the patient upon arrival to the ED.                                                                                                                                                                                                                                                                                                                                                                                                         | Field type: Numeric<br>Field length: 3 digits<br><br>Valid data: 30 - 300    |
| Arrival diastolic blood pressure        | The diastolic blood pressure (in mmHg) of the patient upon arrival to the ED.                                                                                                                                                                                                                                                                                                                                                                                                        | Field type: Numeric<br>Field length: 3 digits<br><br>Valid data: 20 - 200    |
| Arrival respiratory rate                | The respiratory rate (in number of breaths per minute) of the patient upon arrival to the ED.                                                                                                                                                                                                                                                                                                                                                                                        | Field type: Numeric<br>Field length: 2 digits<br><br>Valid data: 0 - 80      |
| Arrival oxygen saturation               | The oxygen saturation (in percent) of the patient upon arrival to the ED.                                                                                                                                                                                                                                                                                                                                                                                                            | Field type: Numeric<br>Field length: 3 digits<br><br>Valid data: 0 - 100     |
| Lowest oxygen saturation                | The lowest recorded oxygen saturation (in percent) of the patient upon arrival to the ED.                                                                                                                                                                                                                                                                                                                                                                                            | Field type: Numeric<br>Field length: 1 - 3 digits<br><br>Valid data: 0 - 100 |
| Arrival temperature                     | The body temperature of the patient (in Celcius) upon arrival to the ED.                                                                                                                                                                                                                                                                                                                                                                                                             | Field type: Numeric<br>Field length: 2 digits<br><br>Valid data: 25 - 44     |
| Arrival/triage Glasgow Coma Score (GCS) | The GCS of the patient upon arrival to the ED or at triage.                                                                                                                                                                                                                                                                                                                                                                                                                          | Field type: Numeric<br>Field length: 2 digits<br><br>Valid data: 3 – 15      |

| <b>Data Element</b>                               | <b>Definition</b>                                                                      | <b>Specifications</b>                                                                                                                                                                                                                                                                                                                                                                                                                                                                                                                                                                                                                                                                                                                                                                                                                   |
|---------------------------------------------------|----------------------------------------------------------------------------------------|-----------------------------------------------------------------------------------------------------------------------------------------------------------------------------------------------------------------------------------------------------------------------------------------------------------------------------------------------------------------------------------------------------------------------------------------------------------------------------------------------------------------------------------------------------------------------------------------------------------------------------------------------------------------------------------------------------------------------------------------------------------------------------------------------------------------------------------------|
| Respiratory distress/ increased work of breathing | Indicate if the patient had respiratory distress/increased work of breathing in ED.    | Field type: Categorical (Select one only)<br>Field length: 1 digit<br><br>Valid data: 0, 1, 9<br><br>0 = No<br>1 = Yes<br>9 = Not Documented                                                                                                                                                                                                                                                                                                                                                                                                                                                                                                                                                                                                                                                                                            |
| Symptoms                                          | Symptoms presented by the patient upon arrival to an ED.                               | Field type: Categorical (with option to select more than one category)<br>Field length: 2 digits<br><br>Valid date: 1 - 29<br><br>1 = Cough<br>2 = Shortness of breath<br>3 = Fever<br>4 = Chills<br>5 = Headache<br>6 = Nausea/vomiting<br>7 = Diarrhea<br>8 = Dysgeusia/anosmia<br>9 = Sputum production<br>10 = Hemoptysis (bloody sputum)<br>11 = Sore throat<br>12 = Runny nose (rhinorrhea)<br>13 = Ear pain<br>14 = Wheezing<br>15 = Chest pain<br>16 = Muscle aches (myalgia)<br>17 = Joint pain (arthralgia)<br>18 = Fatigue/malaise<br>19 = Lower chest wall indrawing<br>20 = Altered consciousness/confusion<br>21 = Seizures<br>22 = Abdominal pain<br>23 = Conjunctivitis<br>24 = Skin rash<br>25 = Skin ulcers<br>26 = Lymphadenopathy<br>27 = Bleeding (hemorrhage)<br>28 = Dizziness/Vertigo<br>29 = None of the above |
| Bleeding site                                     | For patient with bleeding (hemorrhage) as a symptom, use free text to provide details. | Field type: Free-text<br><br>Valid data: Text or blank                                                                                                                                                                                                                                                                                                                                                                                                                                                                                                                                                                                                                                                                                                                                                                                  |

| <b>Data Element</b>                                         | <b>Definition</b>                                                                                                                     | <b>Specifications</b>                                                                                                                                                |
|-------------------------------------------------------------|---------------------------------------------------------------------------------------------------------------------------------------|----------------------------------------------------------------------------------------------------------------------------------------------------------------------|
| Other symptoms<br><br>*Up to 3 other symptoms are recorded* | If symptoms presented by the patient is not included in the dropdown list, indicated up to three additional symptoms using free text. | Field type: Free-text<br><br>Valid data: Text or blank                                                                                                               |
| Date of onset for earliest symptom                          | The date of the onset of the first symptom.                                                                                           | Field type: Date<br>Field length: 8<br><br>Valid data: YYYY-MM-DD and dates ED arrival date                                                                          |
| Tobacco Use                                                 | Patient's history of tobacco use prior to arrival to the ED.                                                                          | Field type: Categorical (Select one only)<br>Field length 1 digit<br><br>Valid data: 0, 1, 2, 9<br><br>0 = Never<br>1 = Past user<br>2 = Current user<br>9 = Unknown |
| Vaping                                                      | Patient's history of vaping prior to arrival to the ED.                                                                               | Field type: Categorical (Select one only)<br>Field length 1 digit<br><br>Valid data: 0, 1, 2, 9<br><br>0 = Never<br>1 = Past user<br>2 = Current user<br>9 = Unknown |
| Alcohol misuse                                              | Patient's history of alcohol misuse prior to arrival to the ED.                                                                       | Field type: Categorical (Select one only)<br>Field length 1 digit<br><br>Valid data: 0, 1, 2, 9<br><br>0 = Never<br>1 = Past user<br>2 = Current user<br>9 = Unknown |
| Illicit substances use                                      | Patient's history of using illicit substances prior to arrival to the ED.                                                             | Field type: Categorical (Select one only)<br>Field length 1 digit<br><br>Valid data: 0, 1, 2, 9<br><br>0 = Never<br>1 = Past user<br>2 = Current user<br>9 = Unknown |



| <b>Data Element</b>              | <b>Definition</b>                                                                                                                                                                                | <b>Specifications</b>                                                                                                                                                                                                   |
|----------------------------------|--------------------------------------------------------------------------------------------------------------------------------------------------------------------------------------------------|-------------------------------------------------------------------------------------------------------------------------------------------------------------------------------------------------------------------------|
| Type of illicit substances       | For patient with past or current usage of illicit substances prior to arrival to the ED, provide details on the type of illicit substance that used.                                             | Field type: Categorical (with option to select more than one category)<br>Field length: 1 digit<br><br>Valid data: 1, 2, 3<br><br>1 = Opioids<br>2 = Stimulants<br>3 = Cannabis                                         |
| Other type of illicit substances | For patient with past or current usage of illicit substances prior to arrival to the ED and the type of illicit substances is not listed in the dropdown menu, use free text to provide details. | Field type: Free-text or blank                                                                                                                                                                                          |
| Code status pre-ED               | The type of resuscitation procedures (if any) the patient would receive if her/his heart or breathing were to stop before arriving to the ED.                                                    | Field type: Categorical (Select one only)<br>Field length 1 digit<br><br>Valid data: 0, 1, 2, 3<br><br>0 = Full code<br>1 = Not documented<br>2 = Do not resuscitate<br>3 = Level of care                               |
| Level of care pre-ED             | If the code status pre-ED is 3 (level of care), use free text to provide details.                                                                                                                | Field type: Free-text or blank                                                                                                                                                                                          |
| Code status in ED                | The type of resuscitation procedures (if any) the patient would receive if her/his heart or breathing were to stop after admitted to the ED.                                                     | Field type: Categorical (Select one only)<br>Field length 1 digit<br><br>Valid data: 0, 1, 2, 3<br><br>0 = Full code<br>1 = Not documented<br>2 = Do not resuscitate<br>3 = Level of care (describe in free text below) |
| Level of care in ED              | If the code status pre-ED is 3 (level of care), use free text to provide details.                                                                                                                | Field type: Free-text or blank                                                                                                                                                                                          |
| Oxygen delivered                 | Indicate if oxygen was delivered to patient in the ED.                                                                                                                                           | Field type: Categorical (Select one only)<br>Field length 1 digit<br><br>Valid data: 0, 1<br><br>0 = No<br>1 = Yes                                                                                                      |

| Data Element                    | Definition                                                                                              | Specifications                                                                                                                                                                                                                                                                                                                                  |
|---------------------------------|---------------------------------------------------------------------------------------------------------|-------------------------------------------------------------------------------------------------------------------------------------------------------------------------------------------------------------------------------------------------------------------------------------------------------------------------------------------------|
| Mode of oxygen delivery         | Mode of oxygen delivery in ED prior to induction sequence initiated.                                    | Field type: Categorical (with option to select more than one category)<br>Field length 1 digit<br><br>Valid data: 1, 2, 3, 4, 5, 6, 7<br><br>1 = Nasal prongs<br>2 = Facemask<br>3 = Simple rebreather<br>4 = Non-rebreather<br>5 = High-flow nasal oxygen (e.g., Optiflow, Airvo)<br>6 = Bilevel pressure vent<br>7 = Continuous pressure vent |
| Nasal prong duration            | For patient who received oxygen by nasal prongs, the direction of nasal prong used (in hours) in ED.    | Field type: Numeric<br>Field length: 2 digits<br><br>Valid data: 0 to 48                                                                                                                                                                                                                                                                        |
| Nasal prong max oxygen          | For patient who received oxygen by nasal prongs, the maximum oxygen delivered (in L/min) in ED.         | Field type: Free text<br><br>Valid data: Text                                                                                                                                                                                                                                                                                                   |
| Face mask duration              | For patient who received oxygen by face mask, the direction of face mask used (in hours) in ED.         | Field type: Numeric<br>Field length: 2 digits<br><br>Valid data: 0 to 48                                                                                                                                                                                                                                                                        |
| Face mask max oxygen            | For patient who received oxygen by Face mask, the maximum oxygen delivered (in L/min) in ED.            | Field type: Free text<br><br>Valid data: Text                                                                                                                                                                                                                                                                                                   |
| Simple rebreather duration      | For patient who received oxygen by simple rebreather, the direction of face mask used (in hours) in ED. | Field type: Numeric<br>Field length: 2 digits<br><br>Valid data: 0 to 48                                                                                                                                                                                                                                                                        |
| Simple rebreather max oxygen    | For patient who received oxygen by simple rebreather, the maximum oxygen delivered (in L/min) in ED.    | Field type: Free text<br><br>Valid data: Text                                                                                                                                                                                                                                                                                                   |
| Non-rebreather duration         | For patient who received oxygen by non-rebreather, the direction of face mask used (in hours) in ED.    | Field type: Numeric<br>Field length: 2 digits<br><br>Valid data: 0 to 48                                                                                                                                                                                                                                                                        |
| Non-rebreather max oxygen       | For patient who received oxygen by non-rebreather, the maximum oxygen delivered (in L/min) in ED.       | Field type: Free text<br><br>Valid data: Text                                                                                                                                                                                                                                                                                                   |
| High-flow nasal oxygen duration | For patient who received oxygen by high-flow nasal, the direction of face mask used (in hours) in ED.   | Field type: Numeric<br>Field length: 2 digits<br><br>Valid data: 0 to 48                                                                                                                                                                                                                                                                        |
| High-flow nasal max oxygen      | For patient who received oxygen by high-flow nasal, the maximum oxygen delivered (in L/min) in ED.      | Field type: Free text<br><br>Valid data: Text                                                                                                                                                                                                                                                                                                   |

| <b>Data Element</b>                          | <b>Definition</b>                                                                                                | <b>Specifications</b>                                                                                                                                                                                                                                                                                                                          |
|----------------------------------------------|------------------------------------------------------------------------------------------------------------------|------------------------------------------------------------------------------------------------------------------------------------------------------------------------------------------------------------------------------------------------------------------------------------------------------------------------------------------------|
| Bilevel pressure vent duration               | For patient who received oxygen by bilevel pressure vent, the direction of face mask used (in hours) in ED.      | Field type: Numeric<br>Field length: 2 digits<br><br>Valid data: 0 to 48                                                                                                                                                                                                                                                                       |
| Bilevel pressure vent max oxygen             | For patient who received oxygen by bilevel pressure vent, the maximum oxygen delivered (in L/min) in ED.         | Field type: Free text<br><br>Valid data: Text                                                                                                                                                                                                                                                                                                  |
| Continuous pressure vent duration            | For patient who received oxygen by continuous pressure vent, the direction of face mask used (in hours) in ED.   | Field type: Numeric<br>Field length: 2 digits<br><br>Valid data: 0 to 48                                                                                                                                                                                                                                                                       |
| Continuous pressure vent duration max oxygen | For patient who received oxygen by continuous pressure vent, the maximum oxygen delivered (in L/min) in ED.      | Field type: Free text<br><br>Valid data: Text                                                                                                                                                                                                                                                                                                  |
| ED/Pre-hospital Intubation                   | Indicate if patient received intubation in the ED or prior to arrival to the ED.                                 | Field type: Categorical (Select one only)<br>Field length 1 digit<br><br>Valid data: 0, 1<br><br>0 = No<br>1 = Yes                                                                                                                                                                                                                             |
| Pre-oxygenation method                       | For patient who received intubation, indicate the method of pre-oxygenation immediately before intubation in ED. | Field type: Categorical (with option to select more than one category)<br>Field length 1 digit<br><br>Valid data: 0 to 9<br><br>0 = Bag-mask valve<br>1 = Nasal prongs<br>2 = Face mask<br>3 = Simple rebreather<br>4 = Non-rebreather<br>5 = Optiflow<br>6 = Bilevel pressure vent<br>7 = Continuous pressure vent<br>8 = None<br>9 = Unknown |
| Bagged                                       | Patient was bagged during intubation in ED.                                                                      | Field length: Categorical (Select one only)<br><br>Valid data: 0, 1, 9<br><br>0 = No<br>1 = Yes<br>2 = Unknown                                                                                                                                                                                                                                 |

| <b>Data Element</b>        | <b>Definition</b>                                                                                | <b>Specifications</b>                                                                                                                                                                                                           |
|----------------------------|--------------------------------------------------------------------------------------------------|---------------------------------------------------------------------------------------------------------------------------------------------------------------------------------------------------------------------------------|
| Paralytic                  | Paralytic agent used in ED.                                                                      | Field length: Categorical (with option to select more than one category)<br><br>Valid data: 1 to 5<br><br>1 = Rocuronium<br>2 = Succinylcholine<br>3 = Other<br>4 = None<br>5 = Unknown                                         |
| Other Paralytic            | If patient received 'Other' type of paralytic agent in the ED, use free text to provide details. | Field length: Free text<br><br>Valid data: Text or blank                                                                                                                                                                        |
| Sedative                   | Sedative agent used in ED.                                                                       | Field length: Categorical (with option to select more than one category)<br><br>Valid data: 1 to 6<br><br>1 = Ketamine<br>2 = Propofol<br>3 = Midazolam<br>4 = Etomidate<br>5 = Dexmedatomidine<br>6 = Other                    |
| Other sedative             | If patient received 'Other' type of sedative agent in the ED, use free text to provide details.  | Field length: Free text<br><br>Valid data: Text or blank                                                                                                                                                                        |
| Intubation technique       | Intubation technique used in the ED.                                                             | Field length: Categorical (with option to select more than one category)<br><br>Valid data: 1 to 5<br><br>1 = Video laryngoscope<br>2 = Fiberoptic intubation<br>3 = Direct laryngoscopy<br>4 = Blind nasotracheal<br>5 = Other |
| Other intubation technique | If patient received 'Other' intubation technique, use free text to provide details.              | Field length: Free text<br><br>Valid data: Text or blank                                                                                                                                                                        |

| <b>Data Element</b>      | <b>Definition</b>                                                            | <b>Specifications</b>                                                                                                                                                                                                                                               |
|--------------------------|------------------------------------------------------------------------------|---------------------------------------------------------------------------------------------------------------------------------------------------------------------------------------------------------------------------------------------------------------------|
| Intubation outcome       | Outcome of the intubation in the ED.                                         | Field length: Categorical (Select one only)<br>Valid data: 0 to 5<br><br>0 = First pass success<br>1 = Second pass success<br>2 = Third pass success<br>3 = Rescue device<br>4 = Surgical airway<br>5 = Unable to establish airway                                  |
| Other intubation outcome | If patient had 'Other' intubation outcome, use free text to provide details. | Field length: Free text<br><br>Valid data: Text or blank                                                                                                                                                                                                            |
| Adverse events           | Adverse events observed during intubation.                                   | Field length: Categorical (with option to select more than one category)<br><br>Valid data: 1 to 7<br><br>1 = Desaturation < 80%<br>2 = Desaturation < 70%<br>3 = Vomiting<br>4 = Arrhythmia<br>5 = Cardiac arrest<br>6 = Intubation awareness<br>7 = Dental trauma |

| Data Element                  | Definition                                               | Specifications                                                                                                                                                                                                                                                                                                                                                                                                                                                                                                                                                                                                                                                                                                                                                                                                                                                                                                                                                                                                                                                                 |
|-------------------------------|----------------------------------------------------------|--------------------------------------------------------------------------------------------------------------------------------------------------------------------------------------------------------------------------------------------------------------------------------------------------------------------------------------------------------------------------------------------------------------------------------------------------------------------------------------------------------------------------------------------------------------------------------------------------------------------------------------------------------------------------------------------------------------------------------------------------------------------------------------------------------------------------------------------------------------------------------------------------------------------------------------------------------------------------------------------------------------------------------------------------------------------------------|
| Medication administered in ED | Medications that the patient was administered in the ED. | Field type: Categorical (with option to select more than one category)<br>Field length 2 digits<br><br>Valid data: 1 to 40<br><br>1 = Acyclovir<br>2 = Amoxicillin<br>3 = Amoxicillin / Clavulanate<br>4 = Apixaban / Edoxaban / Rivaroxaban / Dabigatran<br>5 = Azithromycin / Clarithromycin<br>6 = Cefazolin<br>7 = Cefotaxime<br>8 = Ceftazidime<br>9 = Ceftriaxone<br>10 = Chloroquine<br>11 = Cisatracurium<br>12 = Dexamethasone<br>13 = Dexmedetomidine<br>14 = Doxycycline<br>15 = Enoxaparin / Tinzaparin / Dalteparin<br>16 = Epinephrine<br>17 = Etomidate<br>18 = Furosemide<br>19 = Heparin<br>20 = Hydrocortisone<br>21 = Hydroxychloroquine<br>22 = Ipratropium bromide<br>23 = Ketamine<br>24 = Levofloxacin<br>25 = Lopinivir / Ritonavir<br>26 = Meropenem<br>27 = Methylprednisolone<br>28 = Metronidazole<br>29 = Moxifloxacin<br>30 = Norepinephrine<br>31 = Oseltamivir<br>32 = Piperacillin<br>33 = Prednisone<br>34 = Propofol<br>35 = Rocuronium<br>36 = Salbutamol<br>37 = Succinylcholine<br>38 = Valacyclovir<br>39 = Vancomycin<br>40 = Warfarin |

| <b>Data Element</b>          | <b>Definition</b>                                                                                                                  | <b>Specifications</b>                                                                                                                                                                                                                                                                                                                                                                                                                                                                         |
|------------------------------|------------------------------------------------------------------------------------------------------------------------------------|-----------------------------------------------------------------------------------------------------------------------------------------------------------------------------------------------------------------------------------------------------------------------------------------------------------------------------------------------------------------------------------------------------------------------------------------------------------------------------------------------|
| No medications               | Indicate reason for “No medications” being entered into the database.                                                              | Field type: Categorical (Select one only)<br>Field length 1 digit<br><br>Valid data: 0, 1<br><br>0 = I was unable to obtain this patient’s ED medication information<br>1 = Confirm that after reviewing patient’s chart information, this patient was not given any of the above medications in the ED.                                                                                                                                                                                      |
| ED Discharge Diagnosis       | The patient’s diagnosis at the time of discharged from the ED.                                                                     | Field type: Categorical (with option to select more than one category)<br>Field length: 2 digits<br><br>0 = Respiratory disease<br>1 = Suspect COVID-19<br>2 = Confirmed COVID-19<br>3 = Influenza/Flu-like illness<br>4 = Upper Respiratory Tract Infection<br>5 = Pneumonia<br>6 = Viral pneumonia<br>7 = COPD exacerbation<br>8 = Asthma exacerbation<br>9 = Congestive heart failure/pulmonary edema<br>10 = Shortness of Breath, NYD<br>11 = Cough, NYD<br>12 = Fever, NYD<br>13 = Other |
| Other ED Discharge Diagnosis | If patient’s diagnosis at the time of discharged from the ED was ‘Other”, use free text to provide details.                        | Field type: Free-text<br><br>Valid data: Text                                                                                                                                                                                                                                                                                                                                                                                                                                                 |
| ED Alternate Diagnosis       | Any other ED discharge diagnoses listed                                                                                            | Field type: Free-text or blank                                                                                                                                                                                                                                                                                                                                                                                                                                                                |
| ED Disposition               | Patient’s type of separation from the ambulatory care services after registration.                                                 | Field type: Categorical (Select one only)<br>Field length: 1 digit<br><br>0 = Discharged home<br>1 = Admitted<br>2 = Left AMA<br>3 = Transferred to other hospital<br>4 = Transfer to LTC/Rehab<br>5 = Death<br>6 = Other                                                                                                                                                                                                                                                                     |
| Other ED disposition         | If patient’s type of separation from the ambulatory care services after registration is ‘Other’, use free text to provide details. | Field type: Free-text<br><br>Valid data: Text                                                                                                                                                                                                                                                                                                                                                                                                                                                 |

| <b>Data Element</b>         | <b>Definition</b>                                                                                       | <b>Specifications</b>                                                                                                                                                                                                                                                                                                                                                                 |
|-----------------------------|---------------------------------------------------------------------------------------------------------|---------------------------------------------------------------------------------------------------------------------------------------------------------------------------------------------------------------------------------------------------------------------------------------------------------------------------------------------------------------------------------------|
| ED Disposition date/time    | Date and time the decision was made about the patient's disposition.                                    | Field type: Date time<br>Field length 14<br><br>Valid data: YYYY-MM-DD HH:MM:SS and date time is after ED arrive date/time.                                                                                                                                                                                                                                                           |
| <b>Diagnostic Variables</b> |                                                                                                         |                                                                                                                                                                                                                                                                                                                                                                                       |
| COVID test pre-ED           | Patient received COVID testing done prior to ED visit in the past 14 days.                              | Field type: Categorical (Select one only)<br>Field length 1 digit<br><br>Valid data: 0, 1, 9<br><br>0 = No<br>1 = Yes<br>9 = Unknown                                                                                                                                                                                                                                                  |
| Source of swab              | The type of swab that was done if patient received COVID testing prior to ED visit in the past 14 days. | Field type: Categorical (Select one only)<br>Field length: 2 digits<br><br>Valid data: 0 - 12<br><br>0 = Nasopharyngeal swab<br>1 = Mouth swab/saliva<br>2 = Sputum<br>3 = Broncho-alveolar lavage<br>4 = Tracheal aspirate<br>5 = Feces<br>6 = Urine<br>7 = Blood test<br>8 = Bronchial brush<br>9 = Nasal wash<br>10 = Cerebrospinal fluid<br>11 = Other<br>12 = Mid-Turbinate swab |
| Other swab collection       | If the type of swab is 'Other', use free text to provide details.                                       | Field type: Free-text or blank                                                                                                                                                                                                                                                                                                                                                        |
| COVID test results pre-ED   | Results of COVID testing for patient who received testing prior to ED visit in the past 14 days.        | Field type: Categorical (Select one only)<br>Field length: 1 digit<br><br>Valid data: 0, 1, 2, 9<br><br>0 = Negative<br>1 = Positive<br>2 = Indeterminate<br>9 = Unknown                                                                                                                                                                                                              |



| <b>Data Element</b>                                                                              | <b>Definition</b>                                                                    | <b>Specifications</b>                                                                                                                                                                                                                                                                                                                                                                 |
|--------------------------------------------------------------------------------------------------|--------------------------------------------------------------------------------------|---------------------------------------------------------------------------------------------------------------------------------------------------------------------------------------------------------------------------------------------------------------------------------------------------------------------------------------------------------------------------------------|
| COVID test date pre-ED                                                                           | Date of the most recent COVID testing done prior to the ED visit                     | Field type: Date<br>Field length 8<br><br>Valid data: YYYY-MM-DD or blank                                                                                                                                                                                                                                                                                                             |
| COVID test in ED or hospital                                                                     | Patient received COVID testing in ED/hospital.                                       | Field type: Categorical (Select one only)<br>Field length: 1 digit<br><br>Valid data: 0, 1<br><br>0 = No<br>1 = Yes                                                                                                                                                                                                                                                                   |
| Method of sample collection<br><br>*Up to 20 sample collection entries are recorded*             | Sample collection method for patient who received COVID testing in ED/hospital.      | Field type: Categorical (Select one only)<br>Field length: 2 digits<br><br>Valid data: 0 - 12<br><br>0 = Nasopharyngeal swab<br>1 = Mouth swab/saliva<br>2 = Sputum<br>3 = Broncho-alveolar lavage<br>4 = Tracheal aspirate<br>5 = Feces<br>6 = Urine<br>7 = Blood test<br>8 = Bronchial brush<br>9 = Nasal wash<br>10 = Cerebrospinal fluid<br>11 = Other<br>12 = Mid-Turbinate swab |
| Other method of sample collection<br><br>*Up to 20 other sample collection entries are recorded* | For sample collection method indicated as 'Other', use free text to provide details. | Field type: Free-text or blank                                                                                                                                                                                                                                                                                                                                                        |
| COVID test results in ED/hospital<br><br>*Up to 20 COVID test results are recorded*              | Results of patient's COVID testing in ED/hospital.                                   | Field type: Categorical (Select one only)<br>Field length: 1 digit<br><br>Valid data: 0, 1, 2, 9<br><br>0 = Negative<br>1 = Positive<br>2 = Indeterminate<br>9 = Unknown                                                                                                                                                                                                              |

| <b>Data Element</b>                      | <b>Definition</b>                                                                                  | <b>Specifications</b>                                                                                                                                              |
|------------------------------------------|----------------------------------------------------------------------------------------------------|--------------------------------------------------------------------------------------------------------------------------------------------------------------------|
| COVID test date in ED/hospital           | Date of patient's COVID testing in ED/hospital                                                     | Field type: Date<br>Field length 8 digits                                                                                                                          |
| *Up to 20 COVID test dates are recorded* |                                                                                                    | Valid data: YYYY-MM-DD or blank                                                                                                                                    |
| Serology testing                         | Serology testing for SARS-CoV-2 was done on patient in ED/hospital.                                | Field type: Categorical (Select one only)<br>Field length: 1 digit                                                                                                 |
|                                          |                                                                                                    | Valid data: 0, 1, 2, 9                                                                                                                                             |
|                                          |                                                                                                    | 0 = No<br>1 = Yes<br>9 = Unknown                                                                                                                                   |
| Serology testing date                    | Date of patient's SARS-CoV-2 serology test in ED/hospital.                                         | Field type: Date<br>Field length 8 digits                                                                                                                          |
| Serological test type                    | Type of serological test used for the patient in ED/hospital.                                      | Field type: Categorical (Select one only)<br>Field length: 2 digits                                                                                                |
|                                          |                                                                                                    | Valid data: 0, 1, 2, 9, 11                                                                                                                                         |
|                                          |                                                                                                    | 0 = Enzyme linked immunosorbent assays (ELISAs)<br>1 = Lateral flow immunoassays (LFIAs)<br>2 = Chemiluminescent immunoassays (CLIAs)<br>9 = Unknown<br>11 = Other |
| Other serological test                   | If the type of serological test used for the patient is 'Other', use free text to provide details. | Field type: Free-text or blank                                                                                                                                     |
| COVID-19 IgG test result                 | Patient's COVID-19 IgG test result in mg/dL.                                                       | Field type: Numeric<br>Field length: 3 digits                                                                                                                      |
| COVID-19 IgM test result                 | Patient's COVID-19 IgM test result in mg/dL.                                                       | Field type: Numeric<br>Field length: 3 digits                                                                                                                      |

| <b>Data Element</b>                    | <b>Definition</b>                                                                                | <b>Specifications</b>                                                                                               |
|----------------------------------------|--------------------------------------------------------------------------------------------------|---------------------------------------------------------------------------------------------------------------------|
| Bloodwork completion                   | Completed bloodwork on patient in ED or first bloodwork in hospital.                             | Field type: Categorical (Select one only)<br>Field length: 1 digit<br><br>Valid data: 0, 1<br><br>0 = No<br>1 = Yes |
| Arrival haemoglobin                    | Patient's haemoglobin level (in grams per liter) at arrival to the ED.                           | Field type: Numeric<br>Field length: 3 digits<br><br>Valid data: 0 to 200                                           |
| Arrival white blood cells              | Patient's white blood cells (in 10 <sup>9</sup> cells per liter) count per at arrival to the ED. | Field type: Numeric<br>Field length: 3 digits<br><br>Valid data: 0 to 300                                           |
| Arrival neutrophils                    | Patient's neutrophils count (in cells/microliter) at arrival to the ED.                          | Field type: Numeric<br>Field length: 2 digits<br><br>Valid data: 0 to 50                                            |
| Arrival lymphocytes                    | Patient's lymphocytes count (in 10 <sup>9</sup> cells per liter) at arrival to the ED.           | Field type: Numeric<br>Field length: 2 digits<br><br>Valid data: 0 to 50                                            |
| Arrival platelets                      | Patient's platelets count (in 10 <sup>9</sup> cells per liter) at arrival to the ED.             | Field type: Numeric<br>Field length: 4 digits<br><br>Valid data: 0 to 1000                                          |
| Arrival sodium                         | Patient's sodium level (in mmol/L) at arrival to the ED.                                         | Field type: Numeric<br>Field length: 3 digits<br><br>Valid data: 0 to 250                                           |
| Arrival potassium                      | Patient's potassium level (in mmol/L) at arrival to the ED.                                      | Field type: Numeric<br>Field length: 2 digits<br><br>Valid data: 0 to 10                                            |
| Arrival creatinine                     | Patient's creatinine level (in µmol/L) at arrival to the ED.                                     | Field type: Numeric<br>Field length: 4 digits<br><br>Valid data: 0 to 1000                                          |
| Arrival alanine aminotransferase (ALT) | Patient's ALT level (in U/L) at arrival to the ED.                                               | Field type: Numeric<br>Field length: 5 digits<br><br>Valid data: 0 to 10000                                         |

| <b>Data Element</b>                  | <b>Definition</b>                                                                                                                           | <b>Specifications</b>                                                                                                                                           |
|--------------------------------------|---------------------------------------------------------------------------------------------------------------------------------------------|-----------------------------------------------------------------------------------------------------------------------------------------------------------------|
| Arrival bilirubin                    | Patient's bilirubin level (in $\mu\text{mol/L}$ ) at arrival to the ED.                                                                     | Field type: Numeric<br>Field length: 3 digits<br><br>Valid data: 0 to 300                                                                                       |
| Arrival lactate                      | Patient's lactate level (in $\text{mmol/L}$ ) at arrival to the ED.                                                                         | Field type: Numeric<br>Field length: 2 digits<br><br>Valid data: 0 to 20                                                                                        |
| International normalised ratio (INR) | Patient's INR at arrival to the ED.                                                                                                         | Field type: Numeric<br>Field length: 2 digits<br><br>Valid data: 0 to 10                                                                                        |
| D-dimer                              | Patient's D-dimer level (in $\mu\text{g FEU/L}$ ) at arrival to the ED.                                                                     | Field type: Free-text or blank                                                                                                                                  |
| Procalcitonin                        | Patient's procalcitonin level (in $\text{ng/mL}$ ) at arrival to the ED.                                                                    | Field type: Free-text or blank                                                                                                                                  |
| C-Reactive Protein (CRP)             | Patient's CRP level (in $\text{mg/L}$ ) at arrival to the ED.                                                                               | Field type: Numeric<br>Field length: 3 digits<br><br>Valid data: 0 to 500                                                                                       |
| Troponin                             | Patient's test result for troponin.                                                                                                         | Field type: Categorical (Select one only)<br>Field length: 1 digit<br><br>Valid data: 0, 1<br><br>0 = Negative<br>1 = Positive                                  |
| Troponin I                           | The level of troponin I (in $\text{ng/mL}$ ) for patient with a positive test result for troponin.                                          | Field type: Numeric<br>Field length: 3 digits<br><br>Valid data: 0 to 300                                                                                       |
| Troponin T                           | The level of troponin T (in $\text{ng/mL}$ ) for patient with a positive test result for troponin.                                          | Field type: Numeric<br>Field length: 3 digits<br><br>Valid data: 0 to 300                                                                                       |
| Other troponin results               | Patient's troponin results not otherwise entered.                                                                                           | Field type: Free-text or blank                                                                                                                                  |
| First blood gas                      | Type of patient's first blood gas at arrival to the ED. If arterial blood gas and venous blood gas are available, enter arterial blood gas. | Field type: Categorical (Select one only)<br>Field length: 1 digit<br><br>Valid data: 0, 1, 2, 3<br><br>0 = None<br>1 = Venous<br>2 = Arterial<br>3 = Capillary |

| <b>Data Element</b>        | <b>Definition</b>                                                                                                  | <b>Specifications</b>                                                                                                                            |
|----------------------------|--------------------------------------------------------------------------------------------------------------------|--------------------------------------------------------------------------------------------------------------------------------------------------|
| Date first blood gas drawn | Date of patient's first blood gas at arrival to the ED.                                                            | Field type: Categorical<br>Field length 8 digits<br><br>Valid data: YYYY-MM-DD or blank                                                          |
| pH                         | pH (acidity) measured from patient's first blood gas at arrival to the ED.                                         | Field type: Numeric<br>Field length: 2 digits<br><br>Valid data: 6.5 to 7.7                                                                      |
| pCO2                       | Partial pressure of carbon dioxide (torr) measured from patient's first blood gas at arrival to the ED.            | Field type: Numeric<br>Field length: 3 digits<br><br>Valid data: 0 to 100                                                                        |
| pO2                        | Partial pressure of oxygen (torr) measured from patient's first blood gas at arrival to the ED.                    | Field type: Numeric<br>Field length: 3 digits<br><br>Valid data: 0 to 500                                                                        |
| Oxygen saturation          | The percent of hemoglobin fully combined with oxygen measured from patient's first blood gas at arrival to the ED. | Field type: Numeric<br>Field length: 3 digits<br><br>Valid data: 0 to 100                                                                        |
| Other viral swab           | Patient received other viral swab.                                                                                 | Field type: Categorical (Select one only)<br>Field length: 2 digits<br><br>Valid data: 0, 1<br><br>0 = No<br>1 = Yes                             |
| RSV                        | For patient who received other viral swab test, the patient's result for RSV.                                      | Field type: Categorical (Select one only)<br>Field length: 1 digit<br><br>Valid data: 0, 1, 9<br><br>0 = Negative<br>1 = Positive<br>9 = Unknown |
| Parainfluenza              | For patient who received other viral swab test, the patient's result for parainfluenza.                            | Field type: Categorical (Select one only)<br>Field length: 1 digit<br><br>Valid data: 0, 1, 9<br><br>0 = Negative<br>1 = Positive<br>9 = Unknown |

| <b>Data Element</b>                                           | <b>Definition</b>                                                                         | <b>Specifications</b>                                                                                                                                                                                                                                                                                                                                                                                                                                                                                                |
|---------------------------------------------------------------|-------------------------------------------------------------------------------------------|----------------------------------------------------------------------------------------------------------------------------------------------------------------------------------------------------------------------------------------------------------------------------------------------------------------------------------------------------------------------------------------------------------------------------------------------------------------------------------------------------------------------|
| Rhinovirus                                                    | For patient who received other viral swab test, the patient's result for rhinovirus.      | Field type: Categorical (Select one only)<br>Field length: 1 digit<br><br>Valid data: 0, 1, 9<br><br>0 = Negative<br>1 = Positive<br>9 = Unknown                                                                                                                                                                                                                                                                                                                                                                     |
| Metapneumovirus                                               | For patient who received other viral swab test, the patient's result for metapneumovirus. | Field type: Categorical (Select one only)<br>Field length: 1 digit<br><br>Valid data: 0, 1, 9<br><br>0 = Negative<br>1 = Positive<br>9 = Unknown                                                                                                                                                                                                                                                                                                                                                                     |
| Influenza                                                     | For patient who received other viral swab test, the patient's result for influenza.       | Field type: Categorical (Select one only)<br>Field length: 1 digit<br><br>Valid data: 0, 1, 9<br><br>0 = Negative<br>1 = Positive<br>9 = Unknown                                                                                                                                                                                                                                                                                                                                                                     |
| Chest X-Ray<br><br>*Up to 5 Chest X-Ray results are recorded* | Patient's chest X-ray result in ED/hospital.                                              | Field type: Categorical (with option to select more than one category)<br>Field length: 2 digits<br><br>Valid data: 0 to 13<br><br>0 = CXR not performed<br>1 = Focal consolidation<br>2 = Multi-lobal consolidation<br>3 = Interstitial pneumonia<br>4 = Ground glass opacity<br>5 = Local patchy shadowing<br>6 = Bilateral patchy shadowing<br>7 = Interstitial abnormalities<br>8 = No acute findings<br>9 = Other<br>10 = Atelectasis<br>11 = Pleural effusion<br>12 = Pulmonary fibrosis<br>13 = COPD findings |

| <b>Data Element</b>                                | <b>Definition</b>                                                    | <b>Specifications</b>                                                                                                                                                                                                                                                                                                                                                                                                                                                                                                                          |
|----------------------------------------------------|----------------------------------------------------------------------|------------------------------------------------------------------------------------------------------------------------------------------------------------------------------------------------------------------------------------------------------------------------------------------------------------------------------------------------------------------------------------------------------------------------------------------------------------------------------------------------------------------------------------------------|
| Other Chest X-Ray findings                         | If chest X-ray finding is 'Other', use free text to provide details. | Field type: Free-text or blank                                                                                                                                                                                                                                                                                                                                                                                                                                                                                                                 |
| *A maximum of 5 Chest X-Ray results are collected. |                                                                      |                                                                                                                                                                                                                                                                                                                                                                                                                                                                                                                                                |
| CT Chest                                           | Patient's CT chest result in ED/hospital.                            | Field type: Categorical (with option to select more than one category)<br>Field length: 2 digits<br><br>Valid data: 0 to 14<br><br>0 = CT not performed<br>1 = Focal consolidation<br>2 = Multi-lobal consolidation<br>3 = Interstitial pneumonia<br>4 = Ground glass opacity<br>5 = Local patchy shadowing<br>6 = Bilateral patchy shadowing<br>7 = Interstitial abnormalities<br>8 = No acute findings<br>9 = Other<br>10 = Atelectasis<br>11 = Pleural effusion<br>12 = Pulmonary fibrosis<br>13 = COPD findings<br>14 = Pulmonary embolism |
| Other CT Chest                                     | If CT chest finding is 'Other', use free text to provide details.    | Field type: Free-text or blank                                                                                                                                                                                                                                                                                                                                                                                                                                                                                                                 |
| <b>Hospital Variables</b>                          |                                                                      |                                                                                                                                                                                                                                                                                                                                                                                                                                                                                                                                                |
| Patient admit                                      | Patient was admitted to the hospital.                                | Field type: Categorical (Select one only)<br>Field length: 1 digit<br><br>Valid data: 0, 1<br><br>0 = No<br>1 = Yes                                                                                                                                                                                                                                                                                                                                                                                                                            |

| <b>Data Element</b>                                           | <b>Definition</b>                                                   | <b>Specifications</b>                                                                                                                                                                                                                       |
|---------------------------------------------------------------|---------------------------------------------------------------------|---------------------------------------------------------------------------------------------------------------------------------------------------------------------------------------------------------------------------------------------|
| Level of care after ED                                        | The level of care provided to the patient after admitted to the ED. | Field type: Categorical (Select one only)<br>Field length: 1 digit                                                                                                                                                                          |
| *Up to 5 level of care after admitted to the ED are recorded* |                                                                     | 0 = Regular room<br>1 = Isolation room<br>2 = High acuity/step down<br>3 = ICU<br>4 = Hallway<br>5 = Operating room (without going for surgery)<br>6 = Room but unable to determine isolation status<br>7 = Transferred to another hospital |
| Transfer hospital name                                        | The name of hospital the patient was transferred to.                | Field type: Free-text or blank                                                                                                                                                                                                              |
| Date of transfer into level of care                           | Date of patient submitted to the level of care.                     | Field type: Date<br>Field length 8                                                                                                                                                                                                          |
| Valid data: YYYY-MM-DD or blank                               |                                                                     |                                                                                                                                                                                                                                             |



| Data Element    | Definition                                   | Specifications                                                                                                                                                                                                                                                                                                                                                                                                                                                                                                                                                                                                                                                                                                                                                                                                                                                                                                                                                                                                                                                                 |
|-----------------|----------------------------------------------|--------------------------------------------------------------------------------------------------------------------------------------------------------------------------------------------------------------------------------------------------------------------------------------------------------------------------------------------------------------------------------------------------------------------------------------------------------------------------------------------------------------------------------------------------------------------------------------------------------------------------------------------------------------------------------------------------------------------------------------------------------------------------------------------------------------------------------------------------------------------------------------------------------------------------------------------------------------------------------------------------------------------------------------------------------------------------------|
| New medications | New medications administered in ED/hospital. | Field type: Categorical (with option to select more than one category)<br>Field length 2 digits<br><br>Valid data: 1 to 40<br><br>1 = Acyclovir<br>2 = Amoxicillin<br>3 = Amoxicillin / Clavulanate<br>4 = Apixaban / Edoxaban / Rivaroxaban / Dabigatran<br>5 = Azithromycin / Clarithromycin<br>6 = Cefazolin<br>7 = Cefotaxime<br>8 = Ceftazidime<br>9 = Ceftriaxone<br>10 = Chloroquine<br>11 = Cisatracurium<br>12 = Dexamethasone<br>13 = Dexmedetomidine<br>14 = Doxycycline<br>15 = Enoxaparin / Tinzaparin / Dalteparin<br>16 = Epinephrine<br>17 = Etomidate<br>18 = Furosemide<br>19 = Heparin<br>20 = Hydrocortisone<br>21 = Hydroxychloroquine<br>22 = Ipratropium bromide<br>23 = Ketamine<br>24 = Levofloxacin<br>25 = Lopinivir / Ritonavir<br>26 = Meropenem<br>27 = Methylprednisolone<br>28 = Metronidazole<br>29 = Moxifloxacin<br>30 = Norepinephrine<br>31 = Oseltamivir<br>32 = Piperacillin<br>33 = Prednisone<br>34 = Propofol<br>35 = Rocuronium<br>36 = Salbutamol<br>37 = Succinylcholine<br>38 = Valacyclovir<br>39 = Vancomycin<br>40 = Warfarin |

| <b>Data Element</b>         | <b>Definition</b>                                                                | <b>Specifications</b>                                                                                                                                                                                                                                                                                             |
|-----------------------------|----------------------------------------------------------------------------------|-------------------------------------------------------------------------------------------------------------------------------------------------------------------------------------------------------------------------------------------------------------------------------------------------------------------|
| No new medications          | Indicate reason for no options selected for “New medications in hospital” field. | Field type: Categorical (Select one only)<br>Field length 1 digit<br><br>Valid data: 0, 1<br><br>0 = I was unable to obtain this patient’s hospital medication information<br>1 = I confirm that after reviewing patient’s chart information, this patient was not given any of the above medications in hospital |
| Intubation on ward/in ICU   | For patient admitted to the hospital, patient was intubated on ward or in ICU.   | Field type: Categorical (Select one only)<br>Field length 1 digit<br><br>Valid data: 0, 1, 9<br><br>0 = No<br>1 = Yes<br>9 = Unknown                                                                                                                                                                              |
| Date hospital intubation    | Date the patient was intubated.                                                  | Field type: Date<br>Field length: 8<br><br>Valid data: YYYY-MM-DD or blank                                                                                                                                                                                                                                        |
| Date hospital extubation    | Date the patient was extubated                                                   | Field type: Date<br>Field length: 8<br><br>Valid data: YYYY-MM-DD or blank                                                                                                                                                                                                                                        |
| Re-intubation on ward/ICU   | For patient admitted to the hospital, patient was re-intubated on ward or in ICU | Field type: Categorical (Select one only)<br>Field length: 1 digit<br><br>Valid data: 0, 1, 9<br><br>0 = No<br>1 = Yes<br>9 = Unknown                                                                                                                                                                             |
| Date hospital re-intubation | Date the patient was re-intubated.                                               | Field type: Date<br>Field length: 8<br><br>Valid data: YYYY-MM-DD or blank                                                                                                                                                                                                                                        |
| Date hospital re-extubation | Date the patient was re-extubated                                                | Field type: Date<br>Field length: 8<br><br>Valid data: YYYY-MM-DD or blank                                                                                                                                                                                                                                        |

| <b>Data Element</b>                                 | <b>Definition</b>                                                                                                         | <b>Specifications</b>                                                                                                                                                                                                                                                                                                                                                                                                                                                                                                                                                                                                                                                                                                  |
|-----------------------------------------------------|---------------------------------------------------------------------------------------------------------------------------|------------------------------------------------------------------------------------------------------------------------------------------------------------------------------------------------------------------------------------------------------------------------------------------------------------------------------------------------------------------------------------------------------------------------------------------------------------------------------------------------------------------------------------------------------------------------------------------------------------------------------------------------------------------------------------------------------------------------|
| In-hospital death                                   | In-hospital death is defined death in ED or hospital by any cause.                                                        | Yes/No                                                                                                                                                                                                                                                                                                                                                                                                                                                                                                                                                                                                                                                                                                                 |
| Date hospital death                                 | Date the patient died in hospital.                                                                                        | Field type: Date<br>Field length: 8<br><br>Valid data: YYYY-MM-DD or blank                                                                                                                                                                                                                                                                                                                                                                                                                                                                                                                                                                                                                                             |
| Hospital discharge diagnosis                        | The patient's diagnosis at the time of discharge from the hospital.                                                       | Field type: Categorical (Select one only)<br>Field length 2 digits<br><br>Valid data: 1 to 22<br><br>1 = Suspected case of COVID-19<br>2 = Confirmed case of COVID-19<br>3 = Upper Respiratory Tract Infection<br>4 = Pneumonia<br>5 = Viral pneumonia<br>6 = Cough = NYD<br>7 = Fever = NYD<br>8 = Sinusitis<br>9 = Pharyngitis<br>10 = Flu-like Illness<br>11 = Bronchitis<br>12 = Chronic obstructive lung disease<br>13 = Asthma<br>14 = ARDS Adult respiratory distress syndrome<br>15 = Pulmonary edema/congestive heart failure<br>16 = Pulmonary embolism<br>17 = SOB Shortness of breath<br>18 = Viral pneumonia<br>19 = FUO Fever unknown origin<br>20 = Sepsis = NYD<br>21 = Chest pain = NYD<br>22 = Other |
| *Up to 5 hospital discharge diagnosis are recorded* |                                                                                                                           |                                                                                                                                                                                                                                                                                                                                                                                                                                                                                                                                                                                                                                                                                                                        |
| Other hospital discharge diagnosis                  | If chart indicates hospital discharge diagnosis is 'Other', use free text to provide details.                             | Field type: Free-text or blank                                                                                                                                                                                                                                                                                                                                                                                                                                                                                                                                                                                                                                                                                         |
| Comment on discharge diagnosis                      | Use free text to provide additional information about the patient's diagnosis at the time of discharge from the hospital. | Field type: Free-text or blank                                                                                                                                                                                                                                                                                                                                                                                                                                                                                                                                                                                                                                                                                         |
| Hospital discharge date                             | The date patient was discharged from the hospital.                                                                        | Field type: Date<br>Field length 8<br><br>Valid data: YYYY-MM-DD or blank                                                                                                                                                                                                                                                                                                                                                                                                                                                                                                                                                                                                                                              |
